# Supplementary material
Source: PubMed Central journal article supplement (PMC5454253)
Supplement: rspb20162664supp1.pdf [file rspb20162664supp1.pdf]

## Supplementary online material

Article: Defaunation effects on plant recruitment depend on size matching and size trade-offs in seed-dispersal networks

Authors: Isabel Donoso, Matthias Schleuning, Daniel García, Jochen Fründ.

Journal: Proceedings of the Royal Society B

### Appendix S1. Structure of simulated seed-dispersal networks

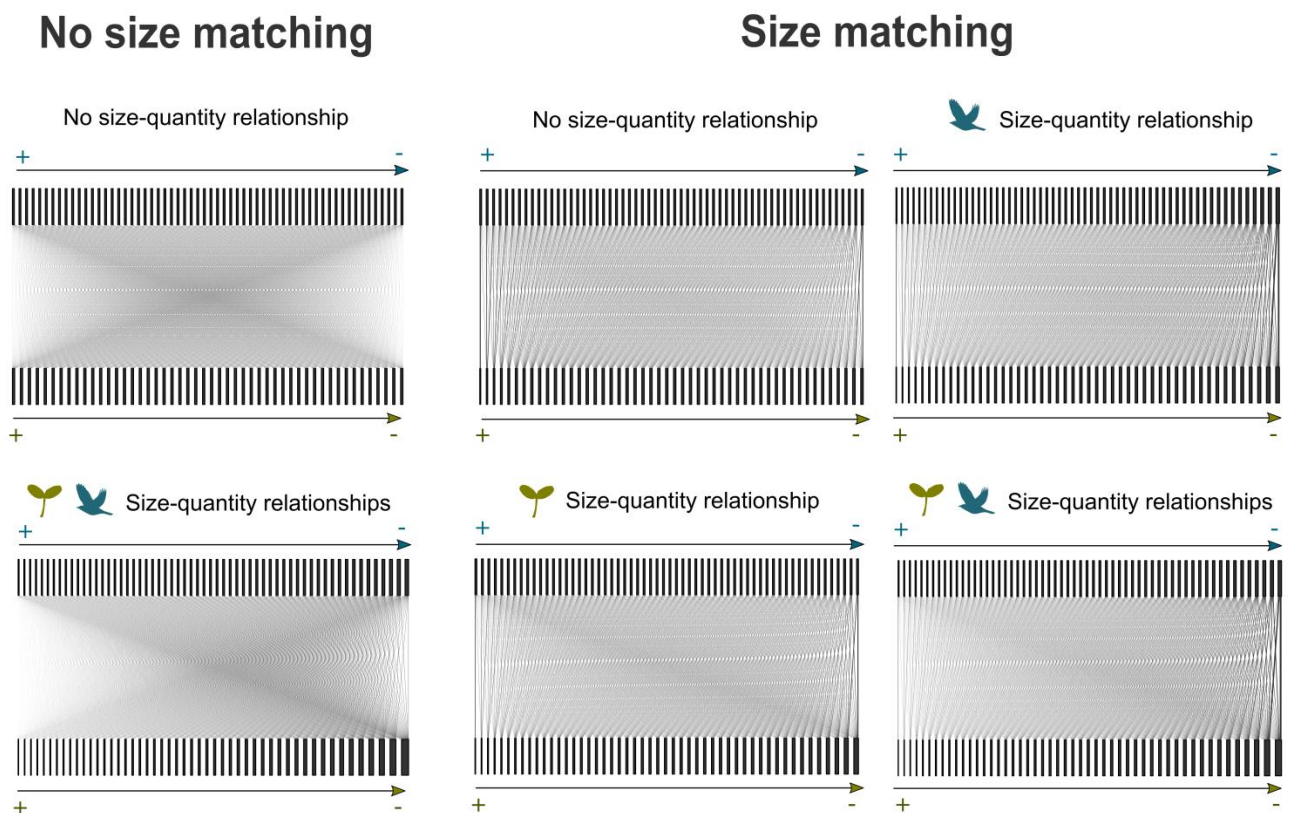

**Figure S1.** Simulated seed dispersal networks displaying the distribution of interactions for each of the six scenarios considered in this study (i.e. structured or not by size matching, crossed with the consideration of a negative size-quantity relationship in plants only, birds only, both or none). Frugivore species appear on the top row of each network, whereas plant species are on the bottom row. All species are ordered by decreasing size (see blue and green arrows for frugivores and plants, respectively).
