# Supplementary material
Source: PubMed Central journal article supplement (PMC5454253)
Supplement: rspb20162664supp2.pdf [file rspb20162664supp2.pdf]

# 1 Supplementary online material

2 Article: Defaunation effects on plant recruitment depend on size matching and size  
3 trade-offs in seed-dispersal networks

4 Authors: Isabel Donoso, Matthias Schleuning, Daniel García, Jochen Fründ.

5 Journal: Proceedings of the Royal Society B

## 6 **Appendix S2. Influence of undercompensation parameter, matching strength** 7 **and niche shape on defaunation curves**

8 Versions of Fig.2-4 after selecting different values for the undercompensation parameter  
9 ( $\beta$ ) (Fig.S1-S6), specialization parameter ( $s$ ) (Fig.S7-S12), and a different niche shape  
10 (Fig.S13-S15).

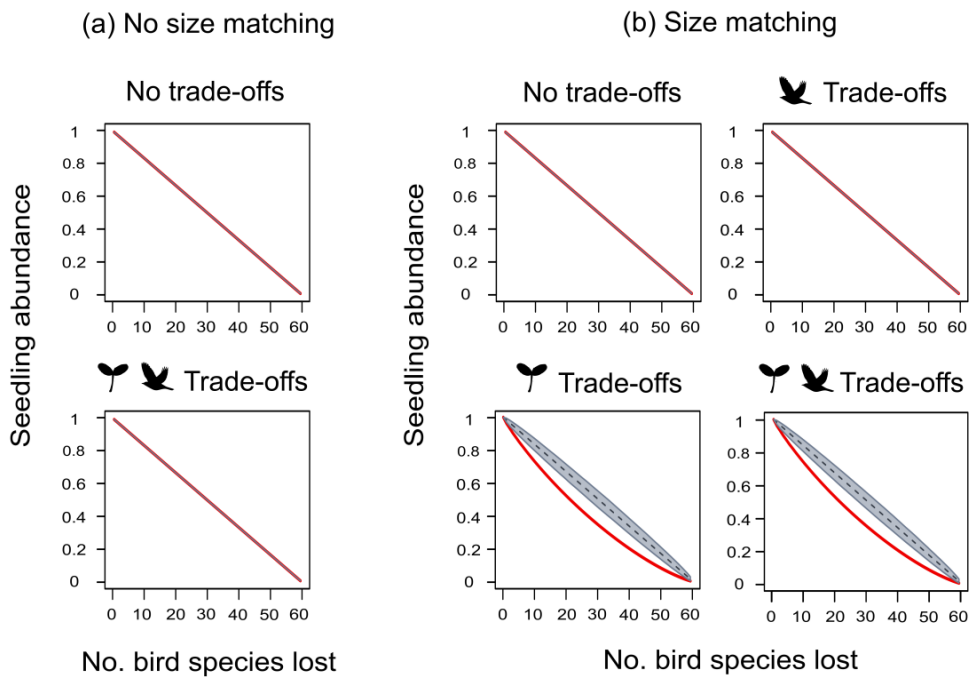

11  
12 **Figure S1.** Defaunation effects on seedling **abundance** under different scenarios of *size*  
13 *matching* and *size trade-offs* using a **skewed** niche shape, specialization parameter  $s=10$   
14 and **no undercompensation** parameter  $\beta$ . We compared consequences of size-  
15 structured bird extinction (red line; defaunation) and random extinction (black dashed  
16 line, with grey areas representing the confidence intervals). Model scenarios were  
17 defined as explained in Fig. 2 of the main text.

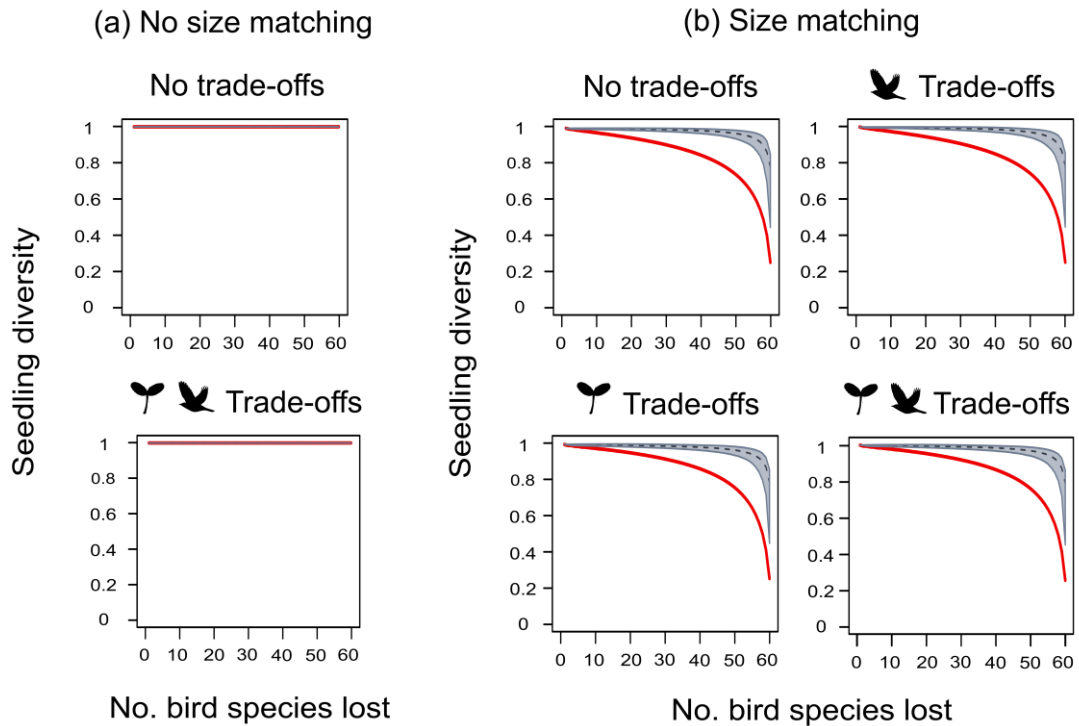

18

19 **Figure S2.** Defaunation effects on seedling **diversity** under different scenarios of *size*  
 20 *matching* and *size trade-offs* using a **skewed** niche shape, specialization parameter  $s=10$   
 21 and **no undercompensation** parameter  $\beta$ . We compared consequences of size-  
 22 structured bird extinction (red line; defaunation) and random extinction (black dashed  
 23 line, with grey areas representing the confidence intervals). Model scenarios were  
 24 defined as explained in Fig. 2 of the main text.

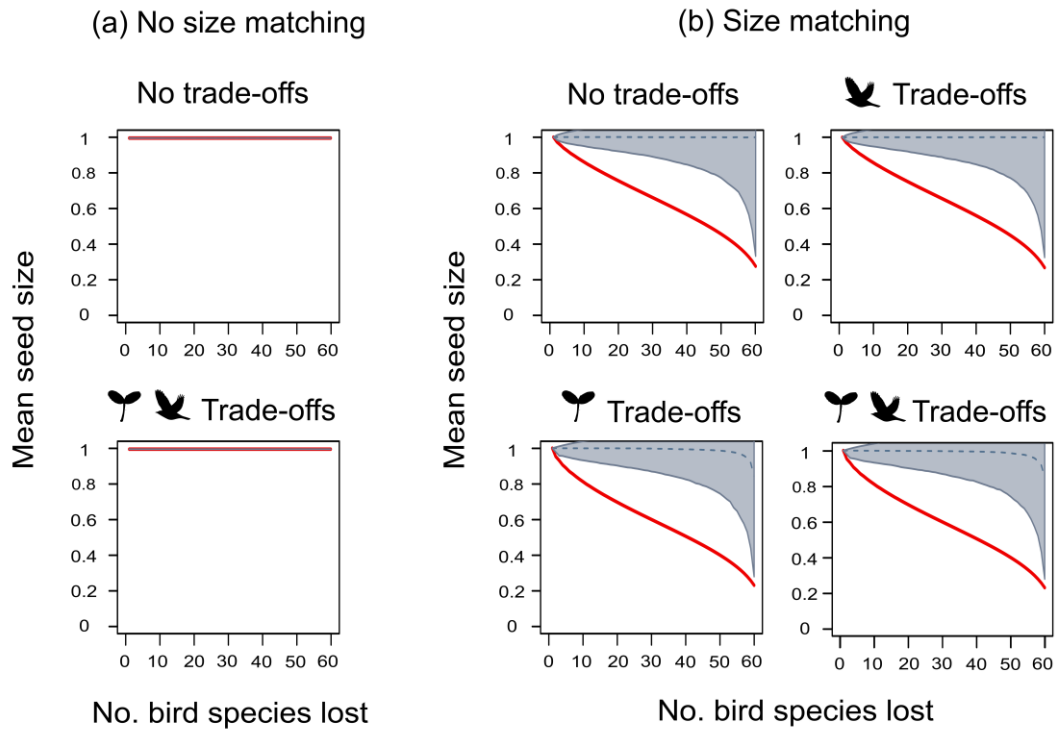

25

26 **Figure S3.** Defaunation effects on **mean seed size** of recruited seedlings under different  
 27 scenarios of *size matching* and *size trade-offs* using a **skewed** niche shape,  
 28 specialization parameter  $s=10$  and **no undercompensation** parameter  $\beta$ . We compared  
 29 consequences of size-structured bird extinction (red line; defaunation) and random  
 30 extinction (black dashed line; grey areas representing the confidence intervals, which  
 31 extend to outside the plotting area). Model scenarios were defined as explained in Fig 2.  
 32 of the main text.

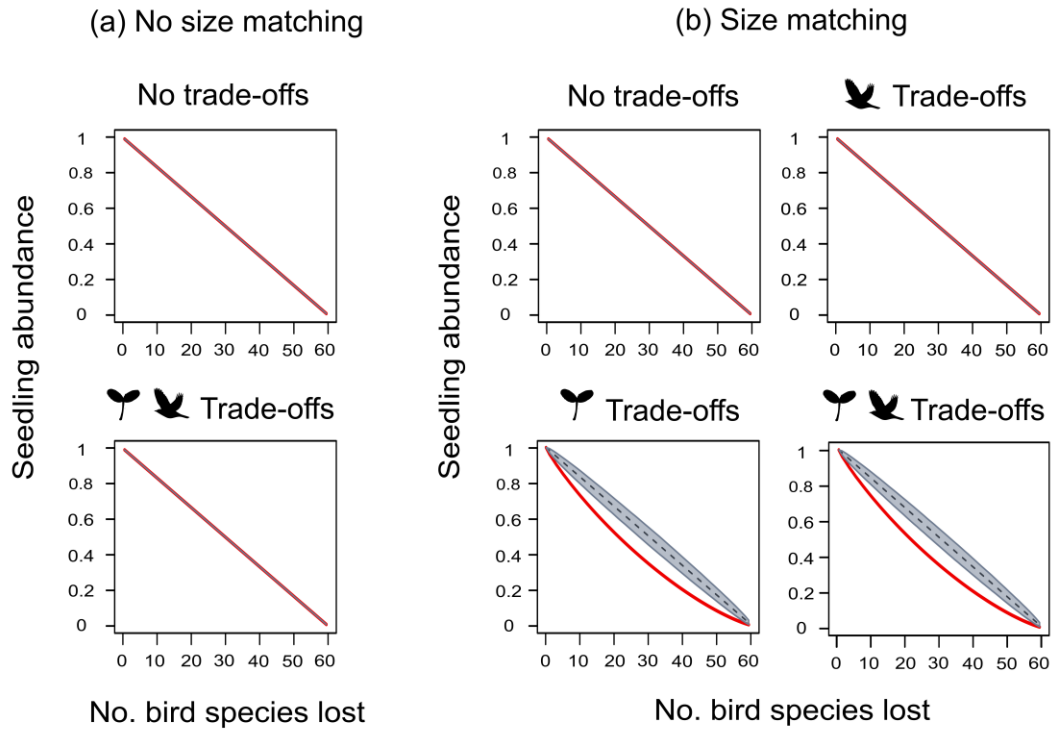

33

34 **Figure S4.** Defaunation effects on seedling **abundance** under different scenarios of *size*

35 *matching* and *size trade-offs* using a **skewed** niche shape, specialization parameter  $s=10$

36 and undercompensation parameter  $\beta$  set to **50% of the maximum value**  $1/x_j$ . We

37 compared consequences of size-structured bird extinction (red line; defaunation) and

38 random extinction (black dashed line, with grey areas representing the confidence

39 intervals). Model scenarios were defined as explained in Fig. 2 of the main text.



40

41 **Figure S5.** Defaunation effects on seedling **diversity** under different scenarios of *size*  
 42 *matching* and *size trade-offs* using a **skewed** niche shape, specialization parameter  $s=10$   
 43 and undercompensation parameter  $\beta$  set to **50% of the maximum value**  $1/x_j$ . We  
 44 compared consequences of size-structured bird extinction (red line; defaunation) and  
 45 random extinction (black dashed line, with grey areas representing the confidence  
 46 intervals). Model scenarios were defined as explained in Fig. 2 of the main text.



47

48 **Figure S6.** Defaunation effects on **mean seed size** of recruited seedlings under different  
 49 scenarios of *size matching* and *size trade-offs* using a **skewed** niche shape,  
 50 specialization parameter  $s=10$  and undercompensation parameter  $\beta$  set to **50% of the**  
 51 **maximum value  $1/x_j$** . We compared consequences of size-structured bird extinction  
 52 (red line; defaunation) and random extinction (black dashed line; grey areas  
 53 representing the confidence intervals, which extend to outside the plotting area). Model  
 54 scenarios were defined as explained in Fig. 2 of the main text.

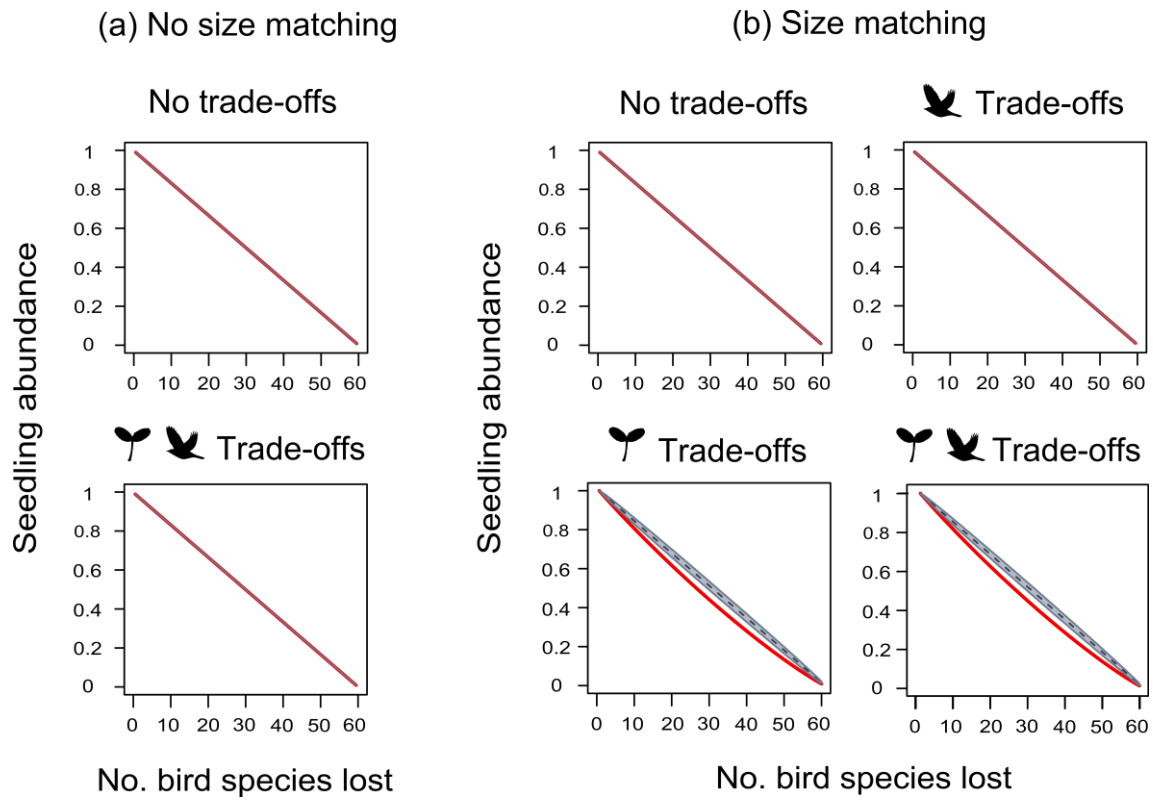

55  
56

57 **Figure S7.** Defaunation effects on seedling **abundance** under different scenarios of *size*  
 58 *matching* and *size trade-offs* using a **skewed** niche shape, specialization parameter  $s=2$   
 59 and undercompensation parameter  $\beta$  set to **10% of the maximum value**  $1/x_j$ . We  
 60 compared consequences of size-structured bird extinction (red line; defaunation) and  
 61 random extinction (black dashed line, with grey areas representing the confidence  
 62 intervals). Model scenarios were defined as explained in Fig. 2 of the main text.

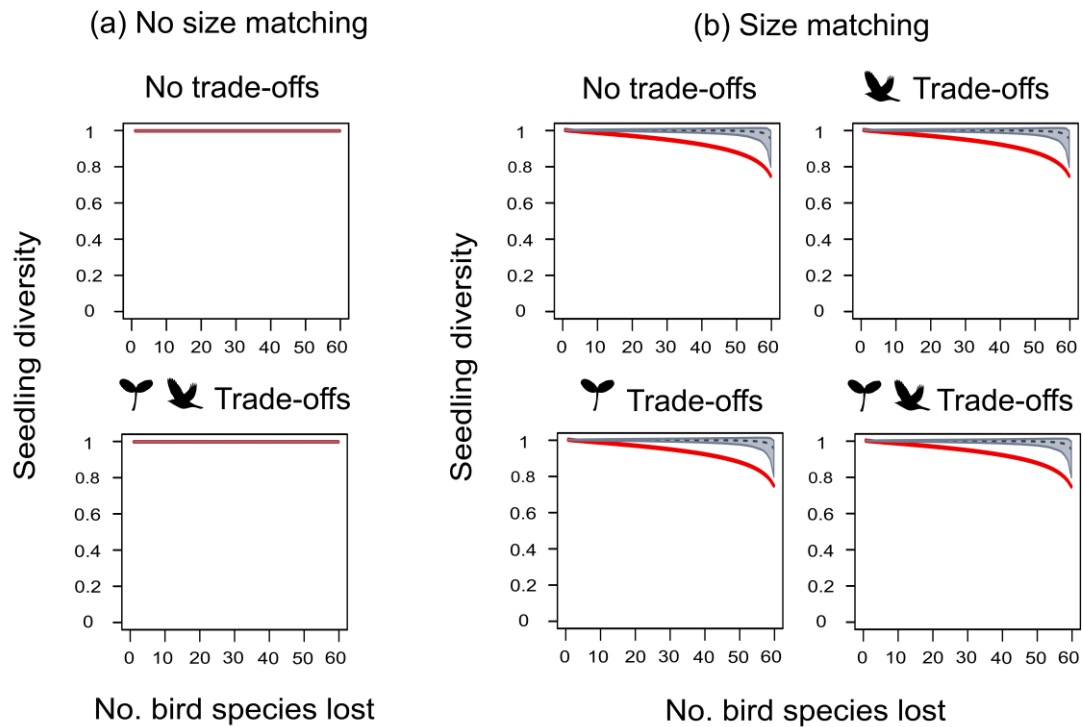

63

64 **Figure S8.** Defaunation effects on seedling **diversity** under different scenarios of *size*  
65 *matching* and *size trade-offs* using a **skewed** niche shape, specialization parameter  $s=2$   
66 and undercompensation parameter  $\beta$  set to **10% of the maximum value**  $1/x_j$ . We  
67 compared consequences of size-structured bird extinction (red line; defaunation) and  
68 random extinction (black dashed line, with grey areas representing the confidence  
69 intervals). Model scenarios were defined as explained in Fig. 2 of the main text.



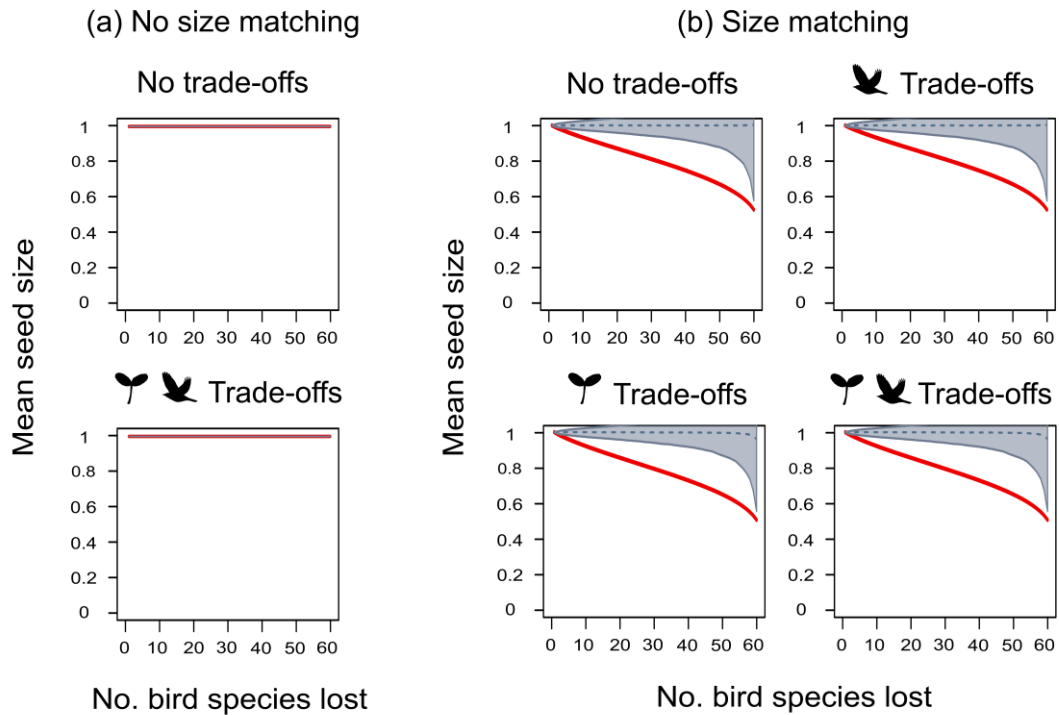

70

71 **Figure S9.** Defaunation effects on **mean seed size** of recruited seedlings under different

72 scenarios of *size matching* and *size trade-offs* using a **skewed** niche shape,

73 specialization parameter  $s=2$  and undercompensation parameter  $\beta$  set to **10% of the**

74 **maximum value  $1/x_j$** . We compared consequences of size-structured bird extinction

75 (red line; defaunation) and random extinction (black dashed line; grey areas

76 representing the confidence intervals, which extend to outside the plotting area). Model

77 scenarios were defined as explained in Fig. 2 of the main text.

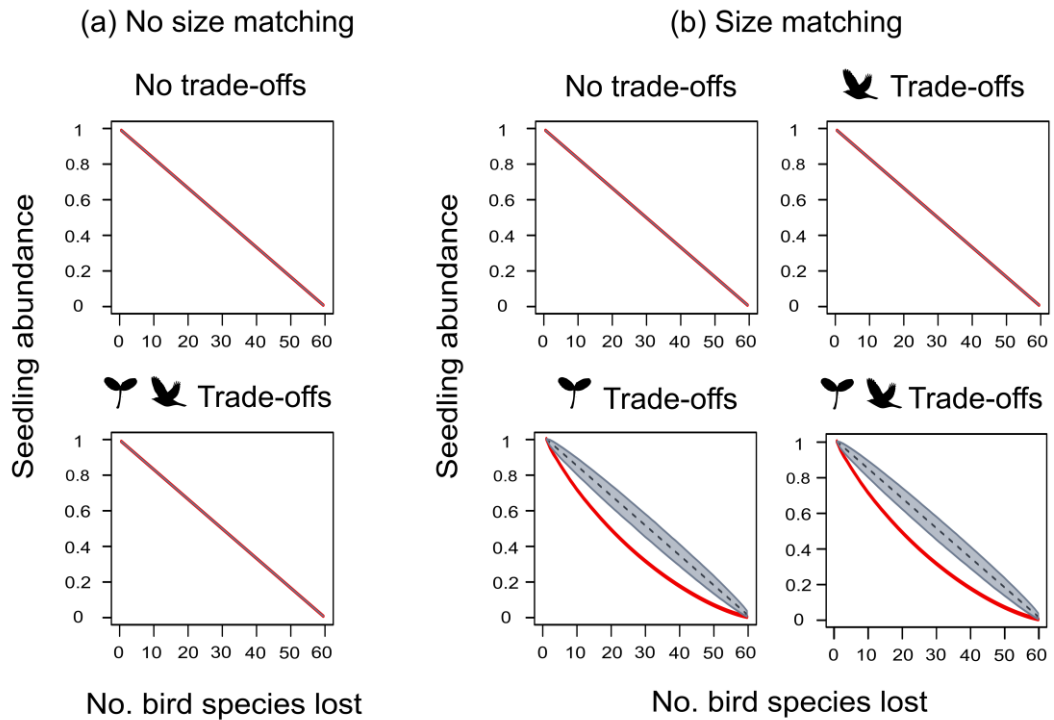

78

79 **Figure S10.** Defaunation effects on seedling **abundance** under different scenarios of  
80 *size matching* and *size trade-offs* using a **skewed** niche shape, specialization parameter  
81  $s=50$  and undercompensation parameter  $\beta$  set to **10% of the maximum value  $1/x_j$** . We  
82 compared consequences of size-structured bird extinction (red line; defaunation) and  
83 random extinction (black dashed line, with grey areas representing the confidence  
84 intervals). Model scenarios were defined as explained in Fig. 2 of the main text.

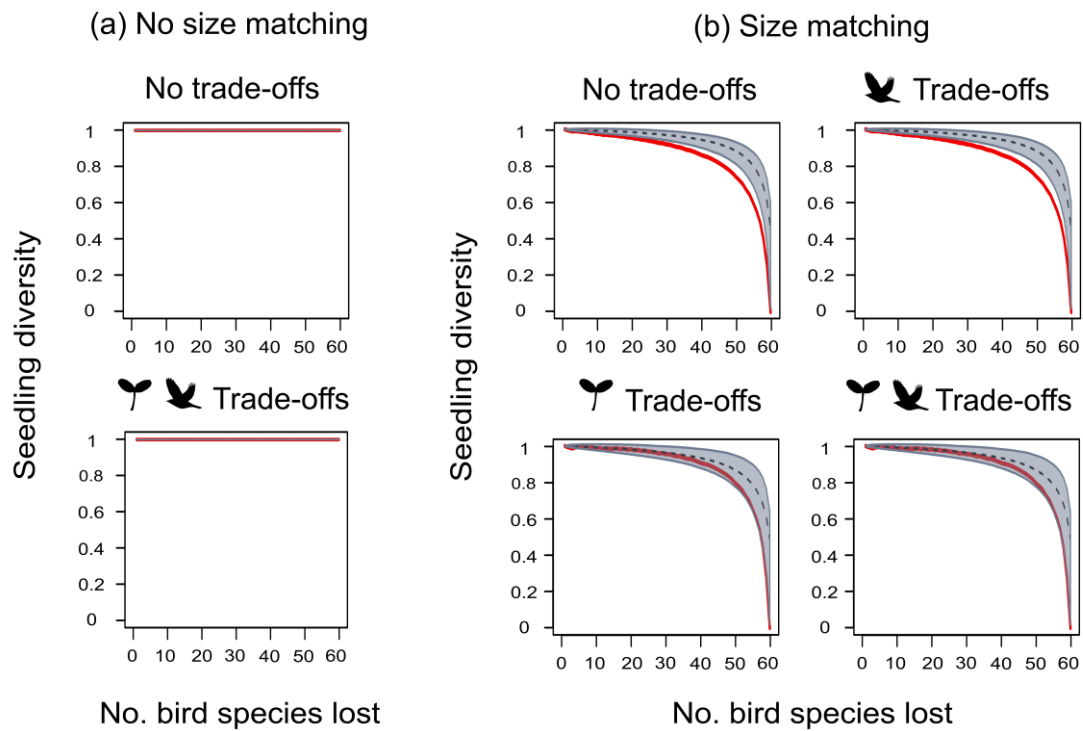

85

86 **Figure S11.** Defaunation effects on seedling **diversity** under different scenarios of *size*  
87 *matching* and *size trade-offs* using a **skewed** niche shape, specialization parameter  $s=50$   
88 and undercompensation parameter  $\beta$  set to **10% of the maximum value**  $1/x_j$ . We  
89 compared consequences of size-structured bird extinction (red line; defaunation) and  
90 random extinction (black dashed line, with grey areas representing the confidence  
91 intervals). Model scenarios were defined as explained in Fig. 2 of the main text.

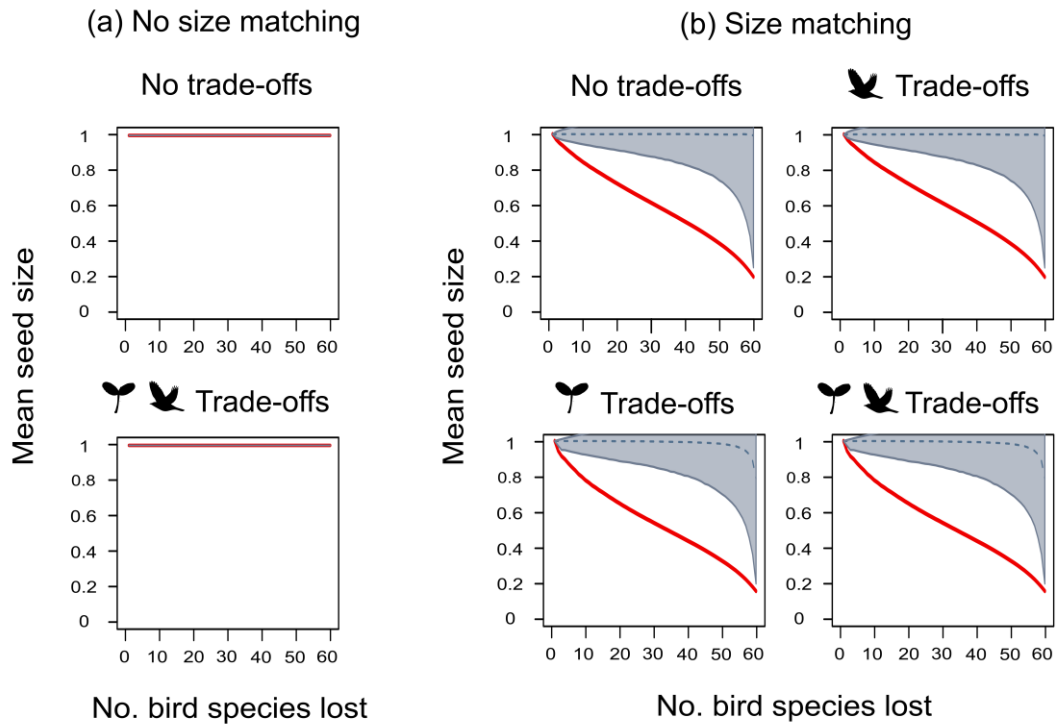

92

93 **Figure S12.** Defaunation effects on **mean seed size** of recruited seedlings under  
 94 different scenarios of *size matching* and *size trade-offs* using a **skewed** niche shape,  
 95 specialization parameter  $s=50$  and undercompensation parameter  $\beta$  set to **10% of the**  
 96 **maximum value  $1/x_j$** . We compared consequences of size-structured bird extinction  
 97 (red line; defaunation) and random extinction (black dashed line; grey areas  
 98 representing the confidence intervals, which extend to outside the plotting area). Model  
 99 scenarios were defined as explained in Fig. 2 of the main text.

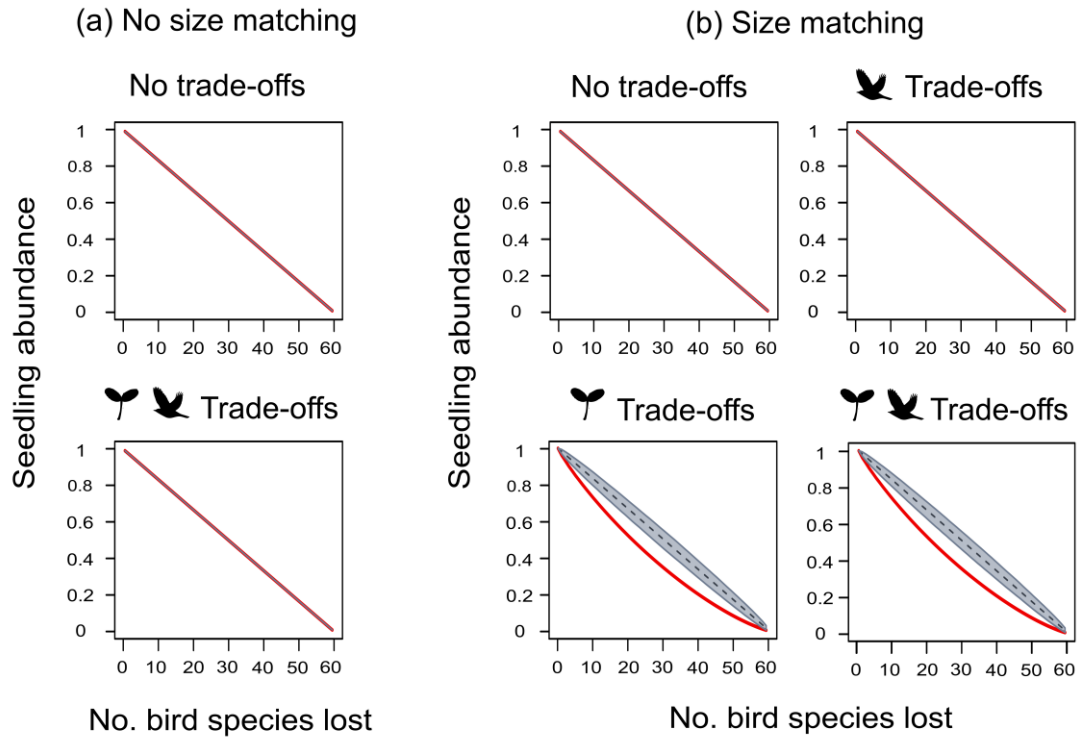

100

101 **Figure S13.** Defaunation effects on seedling **abundance** under different scenarios of  
 102 *size matching* and *size trade-offs* using a symmetric (**Gaussian**) niche shape,  
 103 specialization parameter  $s=10$  and undercompensation parameter  $\beta$  set to **10% of the**  
 104 **maximum value**  $1/x_j$ . We compared consequences of size-structured bird extinction  
 105 (red line; defaunation) and random extinction (black dashed line, with grey areas  
 106 representing the confidence intervals). Model scenarios were defined as explained in  
 107 Fig. 2 of the main text.

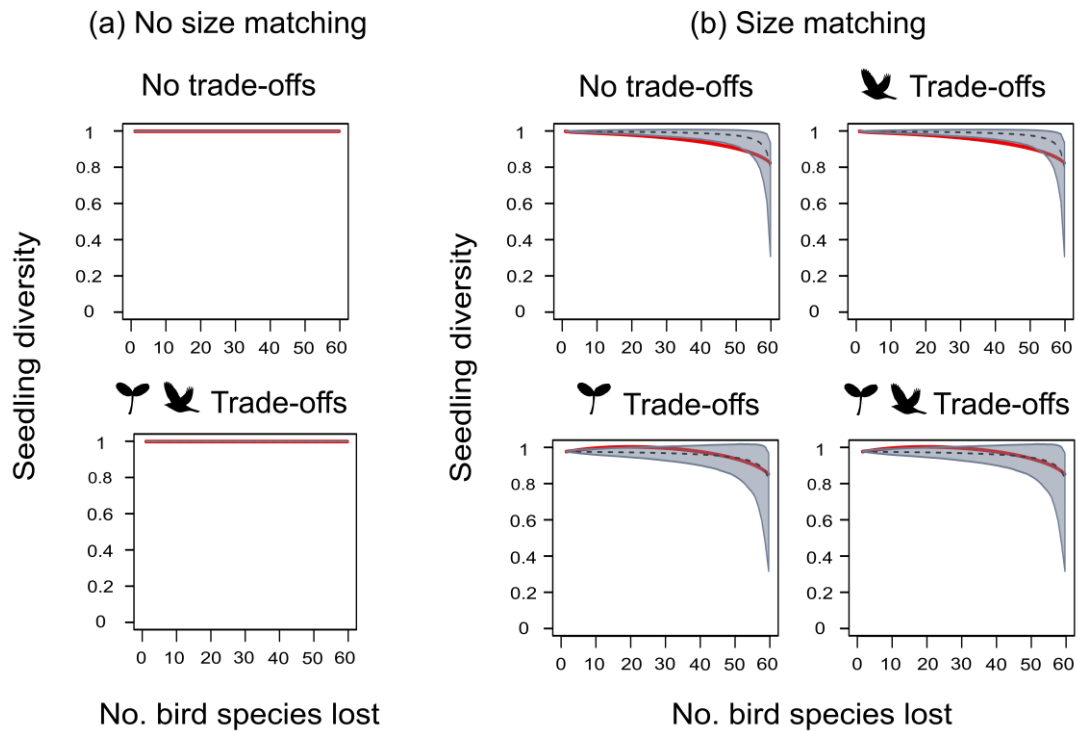

108

109 **Figure S14.** Defaunation effects on seedling **diversity** under different scenarios of *size*  
 110 *matching* and *size trade-offs* using a symmetric (**Gaussian**) niche shape, specialization  
 111 parameter  $s=10$  and undercompensation parameter  $\beta$  set to **10% of the maximum**  
 112 **value  $1/x_j$** . We compared consequences of size-structured bird extinction (red line;  
 113 defaunation) and random extinction (black dashed line, with grey areas representing the  
 114 confidence intervals). Model scenarios were defined as explained in Fig. 2 of the main  
 115 text.

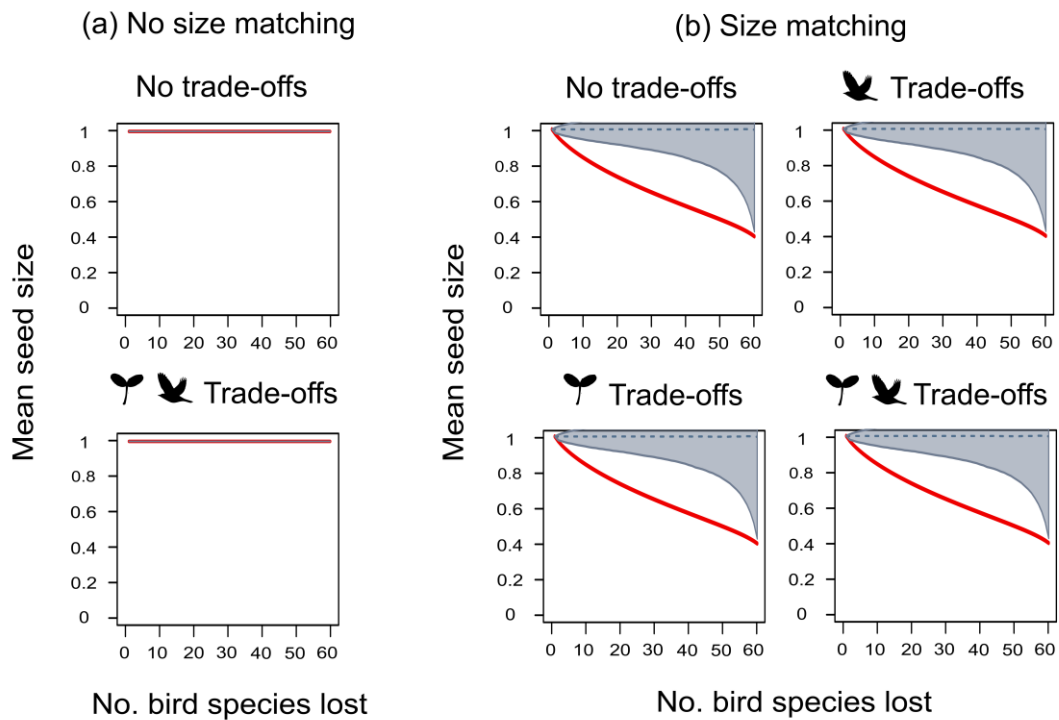

116

117 **Fig S15.** Defaunation effects on **mean seed size** of recruited seedlings under different  
 118 scenarios of *size matching* and *size trade-offs* using a symmetric (**Gaussian**) niche  
 119 shape, specialization parameter  $s=10$  and undercompensation parameter  $\beta$  set to **10% of**  
 120 **the maximum value  $1/x_j$** . We compared consequences of size-structured bird  
 121 extinction (red line; defaunation) and random extinction (black dashed line; grey areas  
 122 representing the confidence intervals, which extend to outside the plotting area). Model  
 123 scenarios were defined as explained in Fig. 2 of the main text.
