# Supplementary material
Source: PubMed Central journal article supplement (PMC5454253)
Supplement: rspb20162664supp3.pdf [file rspb20162664supp3.pdf]

# 1 Supplementary online material

2 Article: Defaunation effects on plant recruitment depend on size matching and size  
3 trade-offs in seed-dispersal networks

4 Authors: Isabel Donoso, Matthias Schleuning, Daniel García, Jochen Fründ.

5 Journal: Proceedings of the Royal Society B

## 6 Appendix S3. Source Code for simulations in the R language for statistical 7 computing

```
8 Explanatory comments (#)
9
10 ## 1) R version 3.3.1 (2016-06-21)
11 ## Platform: x86_64-w64-mingw32/x64 (64-bit)
12 ## Running under: Windows 7 x64 (build 7601) Service Pack 1
13 ##
14 ## 2) Load Packages
15 ## require(vegan)# to calculate Shannon diversity index
16 ## require(Hmisc)# to calculate the community weighted mean of seed size
17
18 # -----
19 # ----- Functions to create our simulated seed dispersal networks -----
20 # ----- Modified from Fründ et. al. (2016) -----
21 # -----
22
23 #---- web generator (quantitative (weighted) niche model) ----
24 makeweb <- function(specpar = 1, birdtraits, planttraits, nicheshape="normal"){
25   # function to generate web with defined "specialization", based on a trait matching concept
26   # the output web has interaction probabilities for all species (assuming equal abundances)
27   # specpar is the specialization parameter (always increases with specialization)
28   # nicheshape: the function calculating pref.values from trait-differences; the default 'normal' uses gaussian/bell-shaped niches
29   fun_pref <- function(traitdif){
30     if (nicheshape == "normal") {
31       prefs <- dnorm(traitdif,mean=0,sd=1/specpar)
32     }
33     if (nicheshape == "skewed"){
34       # a simple skewed function, lognormal shifted to mode=0 (scaling by stretching x)
35       prefs <- dlnorm(traitdif * specpar + exp(-1))
36     }
37     prefs
38   }
39   Nplant <- length(planttraits)
40   Nbird <- length(birdtraits)
41   web <- fun_pref(outer(planttraits,birdtraits,"-") * (-1)) # adjusted this so that traitdif is defined as
42   birdtrait-planttrait
43   web <- web / matrix(colSums(web),nrow=Nplant,ncol=Nbird,byrow=TRUE) # standardize link weights
44   to probability;
45   web
46 }
47
48 #---- create skewed traits ---- (same as get_skewabuns function in Fründ et. al. (2016))
49 get_skewtr <- function(myN, tr_meanlog=2, tr_sdlog=1.5){
50   # generate traits that match a log-normal distribution (but without introducing noise):
51   # divide quantile distribution in N+1 regular intervals, and take the N non-0or1 intvl borders as trait values
52   # it is rescaled in the second step (line70) to really have the intended mean trait (not log-mean)
53   tr <- qlnorm(seq(0, 1, length.out=myN+2), tr_meanlog, tr_sdlog)[-c(1,myN+2)] # takes
54   equidistant points of the quantile function, removing the extremes that would be 0 and Inf
55   tr <- sort(tr, decr=TRUE)
56 }
57
58 #---- make true web from preferences and interaction frequencies ----
59 make_trueweb <- function(web_p, plantfreq, birdfreq){
60   # first step: prepare a web that's used to multiply with the web_p;
61   web_relfreq <- (plantfreq %*% t(birdfreq)) / mean(plantfreq)
```

```

62 # second step: multiply preference web with interaction frequencies
63 web_p * web_relfreq
64 }
65
66
67 #-----
68 #----- STEP 1: GENERATE SEED DISPERSAL NETWORKS -----
69 #-----
70
71 #----(I) Generate the simulated sps pool ----
72 Nbird <- 60
73 Nplant <- 50
74
75 #----(II) Draw trait (SIZE) values using lognormal distributions but with parameters matching the empirical distributions of
76 fruit volume and bird body mass presented in Dehling et. al. (2014) ----
77 ## For the sake of simplicity, we will make available just the final fitted traits (lines 100-115). However, from lines 80-95, we show
78 how to reproduce it with other empirical trait data.
79
80 # Get the mean and sdlog for any empirical traits (parameters to change afterwards within the functions). "volume" and "Bodymass"
81 would be the empirical variables
82
83 # FRUIT SIZE
84 # vol_meanlog <- mean(log(volume^(1/3)))
85 # vol_sdlog <- sd(log(volume^(1/3)))
86 # BIRD BODY MASS
87 # mass_meanlog <- mean(log(Bodymass^(1/3))) # taking the cubic root of mass translates it into a linear (instead of volume)
88 measure
89 # mass_sdlog <- sd(log(Bodymass^(1/3)))
90
91 # Change the values of the parameters mean and sdLog within the function by those empirical ones
92 # PLANTS
93 # fit_pltr <- get_skewtr(Nplant, vol_meanlog, vol_sdlog) ## vector x in the main text
94 # BIRDS
95 # fit_birdtr <- get_skewtr(Nbird, mass_meanlog, mass_sdlog) ## vector y in the main text
96
97 # These are the trait values we obtained (matching the empirical distributions of fruit volume and bird body mass presented in
98 Dehling et al. 2014)
99 # PLANTS
100 fit_pltr<-c(23.716429, 19.578933, 17.298204, 15.737042, 14.556170, 13.609303, 12.820320,
101 12.144684, 11.554152, 11.029717, 10.557994, 10.129207, 9.736007, 9.372729, 9.034917,
102 8.719000, 8.422074, 8.141743, 7.876006, 7.623172, 7.381797, 7.150638, 6.928613,
103 6.714771, 6.508270, 6.308358, 6.114356, 5.925645, 5.741655, 5.561857, 5.385750,
104 5.212858, 5.042716, 4.874868, 4.708854, 4.544203, 4.380421, 4.216975, 4.053279,
105 3.888665, 3.722353, 3.553398, 3.380615, 3.202455, 3.016797, 2.820557, 2.608908,
106 2.373454, 2.096973, 1.731142)
107 # BIRDS
108 fit_birdtr<-c(7.037466, 6.334532, 5.920422, 5.623856, 5.391486, 5.199626, 5.035663,
109 4.892077, 4.764019, 4.648179, 4.542195, 4.444321, 4.353231, 4.267890, 4.187480,
110 4.111336, 4.038914, 3.969761, 3.903497, 3.839797, 3.778383, 3.719013, 3.661475,
111 3.605583, 3.551170, 3.498088, 3.446201, 3.395388, 3.345534, 3.296537, 3.248297,
112 3.200724, 3.153729, 3.107227, 3.061138, 3.015381, 2.969875, 2.924540, 2.879294,
113 2.834051, 2.788723, 2.743215, 2.697425, 2.651240, 2.604538, 2.557178, 2.508999,
114 2.459812, 2.409396, 2.357479, 2.303726, 2.247709, 2.188872, 2.126459, 2.059404,
115 1.986119, 1.904055, 1.808677, 1.690437, 1.521589)
116
117 #---- (III) Once having the trait values... Estimation of the interaction frequency for birds and plants if there is a negative
118 relationship ("YES" scenarios; following  $g=(1/y)+b$  for birds, and following  $f=1/x$  in the case of plants) or if there is no
119 relationship between size-int freq ("NO" scenarios). All the outputs were scale dividing by the mean ----
120
121 ### "YES"
122 # PLANTS. We assume the relationship:  $y=1/x$ 
123 YES_pl_freq <- (1/fit_pltr)/mean((1/fit_pltr)) ## vector fi in the main text
124 # BIRDS. We assume a negative relationship:  $y=(1/x)+b$  (where b is the undercompensation parameter set to the 10% of the
125 maximum value of  $1/x$ 
126 v10 <- max(1/fit_birdtr)/10
127 YES_bird_freq <- ((1/fit_birdtr)+v10)/mean((1/fit_birdtr)+v10) ## vector gj in the main
128 text
129
130 ### "NO". Fixed to the value representing the mean freq of the YES scenarios but as we scale dividing by the mean, the mean freq
131 value is 1
132 # PLANTS
133 mfreqY_pl <- 1
134 NO_pl_freq <- rep(mfreqY_pl,50)
135 # BIRDS
136 mfreqY_bird <- 1
137 NO_bird_freq <- rep(mfreqY_bird,60)

```

```

138
139
140 #----- (IV) Generate the final simulated seed dispersal networks -----
141
142 # TWO INTERACTION RULES
143 # 1. NO SIZE MATCHING (neutral case)
144 web_neutral <- matrix(1,Nplant,Nbird)
145 # 2. SIZE MATCHING
146 web_p <- makeweb(specpar=10, birdtraits=as.vector(decostand(fit_birdtr,"range")),
147 planttraits=as.vector(decostand(fit_pltr,"range")),nicheshape="skewed")
148
149 #-- Calculate final seed dispersal networks incorporating interaction frequencies according to different scenarios: no size matching
150 vs. size matching, crossed with "YES" and "NO" scenarios for the size-interaction frequency relationship in plants only, birds only,
151 none or both. We further fixed the exact bird frequencies and let plant frequencies vary in each scenario.
152
153 # NO SIZE MATCHING SCENARIOS
154 # NONE
155 sc1 <- make_truweb(web_p=web_neutral, birdfreq=NO_bird_freq, plantfreq=NO_pl_freq)
156 sc1b <- sc1/matrix(colSums(sc1)/NO_bird_freq,nrow=Nplant, ncol=Nbird,byrow=TRUE)
157 # in BIRDS ONLY
158 sc2 <- make_truweb(web_p=web_neutral, birdfreq=YES_bird_freq, plantfreq=NO_pl_freq)
159 sc2b <- sc2/matrix(colSums(sc2)/YES_bird_freq, nrow=Nplant, ncol=Nbird,byrow=TRUE)
160 # in PLANTS ONLY
161 sc3 <- make_truweb(web_p=web_neutral, birdfreq=NO_bird_freq, plantfreq=YES_pl_freq)
162 sc3b <- sc3/matrix(colSums(sc3)/NO_bird_freq,nrow=Nplant, ncol=Nbird,byrow=TRUE)
163 # in BOTH
164 sc4 <- make_truweb(web_p=web_neutral, birdfreq=YES_bird_freq, plantfreq=YES_pl_freq)
165 sc4b <- sc4/matrix(colSums(sc4)/YES_bird_freq,nrow=Nplant, ncol=Nbird,byrow=TRUE)
166
167 # SIZE MATCHING SCENARIOS
168 # NONE
169 sc5 <- make_truweb(web_p, birdfreq=NO_bird_freq, plantfreq=NO_pl_freq)
170 sc5b <- sc5/matrix(colSums(sc5)/NO_bird_freq,nrow=Nplant, ncol=Nbird,byrow=TRUE)
171 # in BIRDS ONLY
172 sc6 <- make_truweb(web_p, birdfreq=YES_bird_freq, plantfreq=NO_pl_freq)
173 sc6b <- sc6/matrix(colSums(sc6)/YES_bird_freq,nrow=Nplant, ncol=Nbird,byrow=TRUE)
174 # in PLANTS ONLY
175 sc7 <- make_truweb(web_p, birdfreq=NO_bird_freq, plantfreq=YES_pl_freq)
176 sc7b <- sc7/matrix(colSums(sc7)/NO_bird_freq,nrow=Nplant, ncol=Nbird,byrow=TRUE)
177 # in BOTH
178 sc8 <- make_truweb(web_p, birdfreq=YES_bird_freq, plantfreq=YES_pl_freq)
179 sc8b <- sc8/matrix(colSums(sc8)/YES_bird_freq,nrow=Nplant, ncol=Nbird,byrow=TRUE)
180
181
182 #-----
183 #----- STEP 2: GENERATE 3 DIMENSIONS OF SEEDLING RECRUITMENT -----
184 #-----
185
186 #---- (V) From seed dispersal networks to seedling recruitment networks ----
187
188 # Estimation of seed fate for birds and plants if there is a positive relationship which exactly cancels out the negative interaction
189 frequency-size relationships from step I ("YES" scenarios; following  $y = ax/(1+bx)$  for birds, and following  $y=x$  in the case of
190 plants) or if there is no relationship between size-seed fate ("NO" scenarios). These outputs were also scaled by the respective
191 mean.
192
193 ### "YES"
194 # PLANTS: we assume  $y=x$ 
195 YES_fate_pl <- fit_pltr ## vector qi in the main text
196 # BIRDS: we assume  $y = ax/(1+bx)$ 
197 YES_fate_bird <- fit_birdtr/(1+v10*fit_birdtr) ## vector rj in the main text
198
199 ### "NO"
200 # PLANTS
201 NO_fate_pl <- rep(mean(YES_fate_pl),50)
202 # BIRDS
203 NO_fate_bird <- rep(mean(YES_fate_bird),60)
204
205 # GENERATE the final 6 FULL SCENARIOS
206 # Size-quantity (int freq) and size-quality (seed fate) relationships together constituted a potential quantity-quality trade-off for both
207 plants and birds. For simplicity, we finally excluded "plants only" and "birds only" trade-off scenarios for the no size matching case,
208 as these did not differ from the other neutral scenarios (i.e. those potentially calculate with sc2 and sc3 of step1).
209
210 # NO SIZE MATCHING SCENARIOS
211 recr.web_1 <- sc1b * outer(NO_fate_pl,NO_fate_bird)
212 recr.web_2 <- sc4b * outer(YES_fate_pl,YES_fate_bird)
213 # SIZE MATCHING SCENARIOS

```

```

214 recr.web_3 <- sc5b * outer(NO_fate_pl,NO_fate_bird)
215 recr.web_4 <- sc6b * outer(NO_fate_pl,YES_fate_bird)
216 recr.web_5 <- sc7b * outer(YES_fate_pl,NO_fate_bird)
217 recr.web_6 <- sc8b * outer(YES_fate_pl,YES_fate_bird)
218
219 # create a list with the 6 final webs of seedling recruitment
220 recr.webs_tot <- list(recr.web_1,recr.web_2,recr.web_3,recr.web_4,recr.web_5,recr.web_6)
221 names(recr.webs_tot) <- paste("Full_Scenario", 1:6, sep = "-")
222
223 ---- (VI) Calculate the 3 dimensions of seedling recruitment (Abundance and Diversity of seedlings and mean seed seed)----
224
225 dimensionsSdl <- list()
226 for (i in 1:6){
227   Abund <- sum(recr.webs_tot[[i]]) # abundance
228   Div <- diversity(rowSums(recr.webs_tot[[i]]), index = "shannon") # Shannon diversity (for plants)
229   mean_size <- wtd.mean(fit_pltr,rowSums(recr.webs_tot[[i]])) # mean seed size
230   dimensionsSdl[[i]] <- cbind(Abund, Div, mean_size)
231 }
232 # table with values of the three dimensions of seedling recruitment for each of the 6 scenarios
233 scn_recr.values <- as.data.frame(do.call("rbind", dimensionsSdl))
234
235
236 #-----
237 #----- STEP 3: GENERATE THE DEFAUNATION SCENARIOS -----
238 #-----
239
240 #####
241 ---- RANDOM EXTINCTION SCENARIO ----
242 #####
243
244 # Create an array with 4 dimensions=> [1] 6 Scenarios; [2] bird richness; [3] The 3 dimensions of Sdl recruitment; [4] number of
245 replicates in the case of random extinctions
246
247 Nrep=10000 # number of replicates
248 alldata <- array(NA, dim=c(6,60,3,Nrep))
249 # Define the names of the dimensions of the arrays
250 dimnames(alldata)[[1]] <- paste('Full_Scn',1:6,sep='')
251 dimnames(alldata)[[2]] <- paste('Bird_Rich',60:1,sep='')
252 dimnames(alldata)[[3]] <- c("abun","div","meansize")
253
254 # Create a unique loop for all the scenarios
255 ## put the names of the birds and plants for the whole list with all the recruitment webs
256 for (i in 1:6) {
257   dimnames(recr.webs_tot[[i]]) <- list(paste('p',1:50,sep=''),paste('b',1:60,sep=''))
258 }
259
260 # Calculate 3 dimensions of seedling recruitment for each value of species richness along a random extinction sequence
261 for (k in 1:6){
262   for (n in 1:Nrep){
263     seq.ran <- sample(colnames(recr.webs_tot[[k]]))
264     web.old <- recr.webs_tot[[k]]
265     for(i in 1:60){
266       alldata[k, i, "abun", n] <- sum(web.old)
267       alldata[k, i, "div", n] <- diversity(rowSums(web.old), index="shannon")
268       alldata[k, i, "meansize", n] <- wtd.mean(fit_pltr,rowSums(web.old))
269       web.old <- web.old[, -which(colnames(web.old)==seq.ran[i]), drop=FALSE]
270     }
271   }
272 }
273
274 # mean and confidence intervals of all the replicates for each scenario, bird richness and dimension of seedling recruitment.
275 alldata.ranmean <- apply(alldata, 1:3, mean) ## mean
276 alldata.ranCI_low <- apply(alldata, 1:3, quantile, probs= 0.025,na.rm=T) ## L CI
277 alldata.ranCI_high <- apply(alldata, 1:3, quantile, probs= 0.975,na.rm=T) ## H CI
278
279
280 #####
281 ---- DETERMINISTIC EXTINCTION SCENARIO (size-structured defaunation) ----
282 ----- removing bird species from the largest to the smallest) -----
283 #####
284
285 # Create an array with 3 dimensions=> [1] 6 Scenarios; [2] bird richness; [3] The 3 dimensions of Sdl recruitment
286 alldata_def <- array(NA, dim=c(6,60,3))
287 # Define the names of the dimensions of the arrays
288 dimnames(alldata_def)[[1]] <- paste('Full_Scn',1:6,sep='')
289 dimnames(alldata_def)[[2]] <- paste('Bird_Rich',60:1,sep='')

```

```

290 dimnames(alldata_def)[[3]] <- c("abun","div","meansize")
291
292 for (k in 1:6){
293   seq_def <- colnames(regr.webs_tot[[k]])
294   web.old <- regr.webs_tot[[k]]
295   for(i in 1:60){
296     alldata_def[k, i, "abun"] <- sum(web.old)
297     alldata_def[k, i, "div"] <- diversity(rowSums(web.old))
298     alldata_def[k, i, "meansize"] <- wtd.mean(fit_pltr,rowSums(web.old))
299     web.old <- web.old[ , -which(colnames(web.old)==seq_def[i]), drop=FALSE]
300   }
301 }
302
303 #---- References ----
304 # Dehling M, Töpfer T, Schaefer M, Jordano P, Böhning-Gaese K, Schleuning M. 2014 Functional relationships beyond species
305 richness patterns: trait matching in plant–bird mutualisms across scales. Global Ecol. Biogeogr. 23, 1085–1093
306 (doi:10.1111/geb.12193)
307
308 # Fründ J, McCann K, Williams N. 2016 Sampling bias is a challenge for quantifying specialization and network structure: lessons
309 from a quantitative niche model. Oikos 125, 502–513. (doi:10.1111/oik.02256)

```
